# Supplementary material
Source: bioRxiv or medRxiv preprint supplement (https://medrxiv.org/highwire/filestream/88007/field_highwire_adjunct_files/0/2019.12.28.19015974-1.pdf)
Supplement: Supplementary file [file 2019.12.28.19015974-1.pdf]

**Everolimus improves the efficacy of dasatinib in  
PDGFR $\alpha$ -driven glioma**

Zachary Miklja<sup>1^</sup>, Viveka Nand Yadav<sup>1^</sup>, Rodrigo T. Cartaxo<sup>1</sup>, Ruby Siada<sup>1</sup>, Chase C. Thomas<sup>1</sup>, Jessica R. Cummings<sup>1</sup>, Brendan Mullan<sup>1</sup>, Stefanie Stallard<sup>1</sup>, Alyssa Paul<sup>1</sup>, Amy K. Bruzek<sup>2</sup>, Kyle Wierzbicki<sup>1</sup>, Tao Yang<sup>3</sup>, Taylor Garcia<sup>1</sup>, Ian Wolfe<sup>1</sup>, Marcia Leonard<sup>1</sup>, Patricia L. Robertson<sup>3</sup>, Hugh J.L. Garton<sup>2</sup>, Daniel R. Wahl<sup>4</sup>, Hemant Parmar<sup>5</sup>, Jann N. Sarkaria<sup>6</sup>, Cassie Kline<sup>7</sup>, Sabine Mueller<sup>7</sup>, Theodore Nicolaidis<sup>8</sup>, Chana Glasser<sup>9</sup>, Sarah E.S. Leary<sup>10</sup>, Sriram Venneti<sup>11</sup>, Chandan Kumar-Sinha<sup>11,12</sup>, Arul M. Chinnaiyan<sup>11,12,13,14,15</sup>, Rajen Mody<sup>1</sup>, Manjunath P. Pai<sup>16</sup>, Timothy N. Phoenix<sup>17</sup>, Bernard L. Marini<sup>16</sup>, Carl Koschmann<sup>1\*</sup>

\*Correspondence to: [ckoschma@med.umich.edu](mailto:ckoschma@med.umich.edu)

**This PDF file includes:**

Supplementary methods  
Supplementary figures

## **Supplemental materials**

### **Supplementary methods**

#### **Neurosphere Limiting Dilution Assay**

PPK cells were serially diluted in triplicate at 62, 31, 15, 7, or 3 cells/well in 96 well plates and kept for 24h in an incubator at 37°C/5%CO<sub>2</sub>. Dasatinib and everolimus alone or in combination were added to the plates and sphere growth was monitored for 6 days. When they reached 50 µm in the control condition (DMSO), spheres above 20 µm in every well were counted and the average number plotted for each cell density originally plated.

#### **P-gp assay**

In vitro P-gp inhibitor assay was performed with the Pgp-Glo™ Assay System (Promega). Assay methods were executed as described in the supplied protocol. Briefly, the assay detected the effects of compounds on recombinant human P-gp in a cell membrane fraction. The assay utilized the ATP dependence of the light-generating reaction (firefly luciferase) of ATPase inhibition. Verapamil is a P-gp substrate that stimulates P-gp ATPase activity and, within the assay, functions as a P-gp stimulator (negative control). Sodium orthovanadate (Na<sub>3</sub>VO<sub>4</sub>) provides a measure of P-gp independent ATPase activity and was used as a P-gp inhibitor (positive control) within this assay. All experimental conditions were briefly rocked on a plate shaker and then put in an incubator at 37°C and 5% CO<sub>2</sub> for 3.5 hours. After this incubation period, all conditions were again briefly rocked on a plate shaker and incubated at room temperature for 20 minutes to allow luminescent signal to develop. Luminescent signal (ATM inhibition) was read on a Synergy HTX Multi-Mode microplate reader (BioTek).

## **Human cerebrospinal fluid tumor DNA (CSF-tDNA) analysis**

Tumor DNA analysis was performed by droplet digital PCR (ddPCR), a highly sensitive PCR method that can detect low copy numbers of DNA, including ctDNA, in CSF. PCR primers and fluorescent probes were designed for the wild-type *PDGFRA* and mutant D842V sequences, as well as the target amplification region. An additional assay was designed for the housekeeping gene *AP3B1* to be used as a reference (Bio-Rad). Patient sample CSF underwent ddPCR to document baseline CSF tDNA in UMPED52 and baseline CSF tDNA *PDGFRA* copy number in UMPED44. The Bio-Rad QX200 AutoDG system was used for all ddPCR work, and Bio-Rad QuantaSoft Analysis Pro was used for analysis of results.

## **Western blot and immunohistochemistry**

PDGFR $\alpha$  pathway expression was assessed in primary HGG cell cultures and mouse brain/tumor tissue via immunocytochemistry (1:500) and western blotting (1:1000) with PDGF Receptor  $\alpha$  antibody (Cell Signaling, sc-3174S) and Phospho-PDGFR $\alpha$  antibody (Cell Signaling sc-3170S). PDGFR $\alpha$ /MAPK pathway expression was assessed in primary mouse and human HGG cell culture via western blotting (1:500) with Phospho-Src antibody (Cell Signaling, #6943S), Src antibody (Cell Signaling, #2109S), Phospho-ERK1/2 antibody (Cell Signaling, #4695S), and ERK1/2 antibody (Santa Cruz Biotechnology, sc-514302). Expression for the mTOR pathway was assessed via western blotting using Phospho-S6 antibody (Cell Signaling, #4858S), S6 antibody (Cell Signaling, #2217S), Phospho-p70 S6 Kinase antibody (Cell Signaling, #9234T), and p70 S6 Kinase antibody (Cell Signaling, #2708T). P-glycoprotein (P-gp) expression in PDGFR $\alpha$ -driven HGG mouse brain and tumor tissue was assessed by

immunohistochemistry (1:50) with P-gp antibody (Santa Cruz Biotechnology, sc-390883). Phospho-Src, total Src, phospho-S6, and total S6 expression in PDGFRA-driven HGG mouse brain and tumor tissue were assessed by immunohistochemistry with Phospho-Src antibody (Cell Signaling, #6943S), Src antibody (Cell Signaling, #2109S), Phospho-S6 antibody (Cell Signaling, #4858S), and S6 antibody (Cell Signaling, #2217S), respectively.

### **Supplementary Figures**



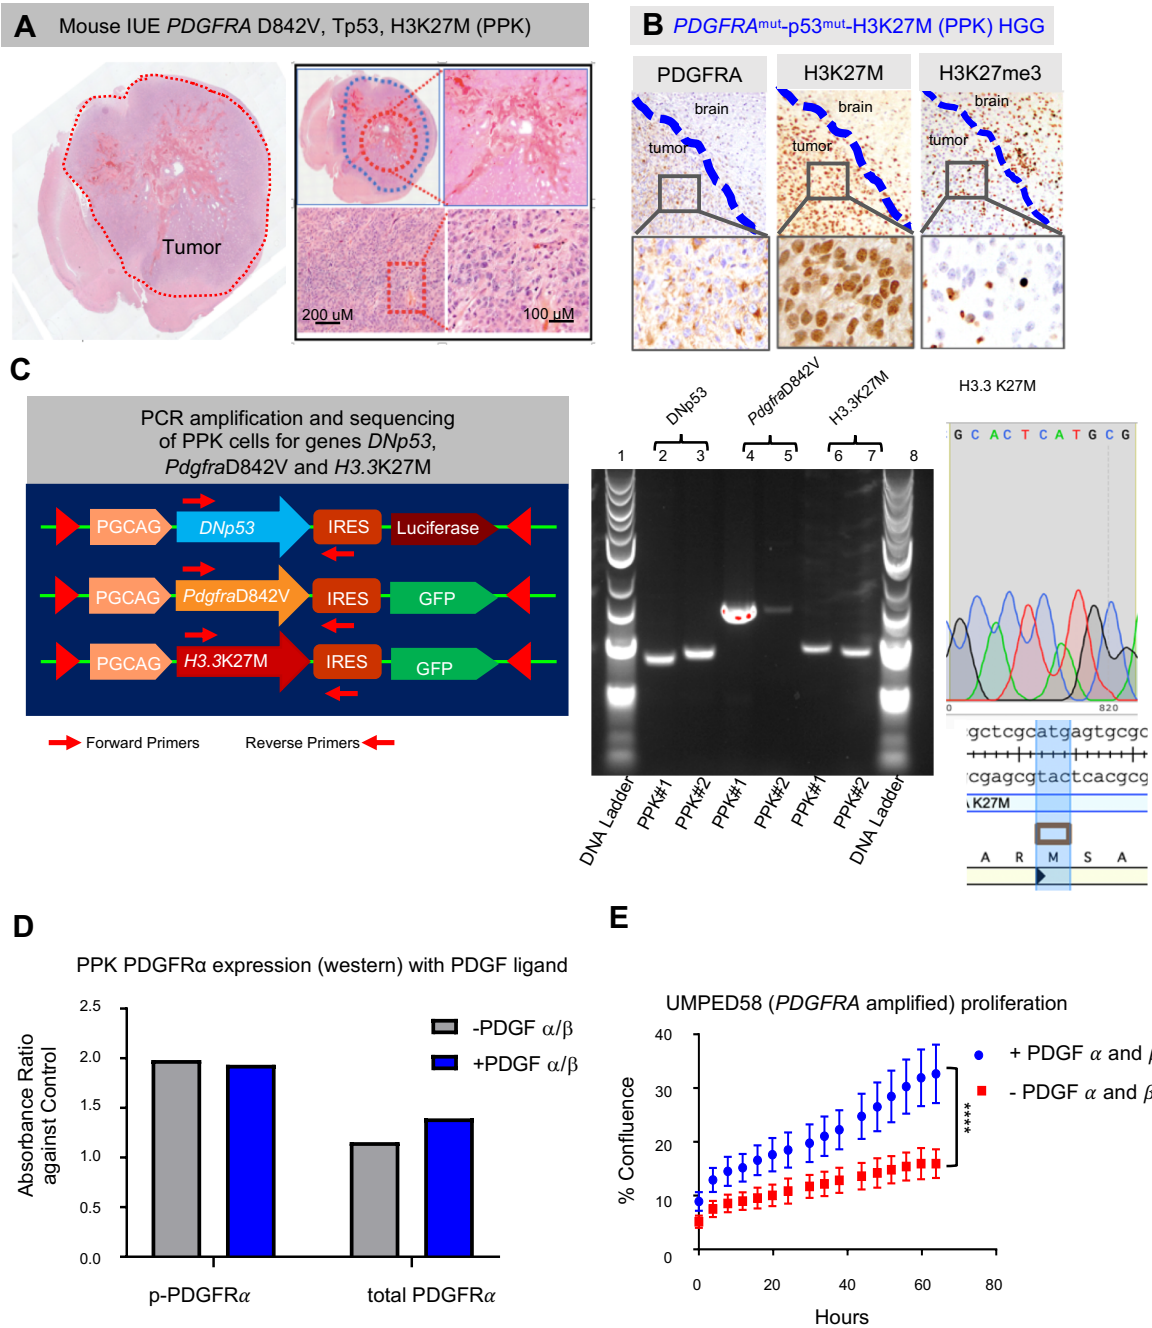

**Figure S1:** Characterization of IUE PPK generated tumors and primary cell culture **A)** Representative coronal plane image of mouse brain with IUE PPK tumor (80-90% cortex effaced) (left). Tumor images for IUE PPK generated tumors depicting high-grade features including necrosis and vascular proliferation (right). **B)** IHC for IUE PPK tumors demonstrating increased total *PDGFRA*, tumor-specific positive staining for *H3K27M*, and negative staining for *H3K27me3*. **C)** Sequencing of PPK cells for genes *DNp53*, *PDGFRA* D842V and *H3.3K27M*. **D)** Quantification of p-*PDGFRA* and total *PDGFRA* expression in western blot of PPK cells with *PDGF* $\alpha/\beta$  ligand supplementation. **E)** Growth response of human HGG tumor cells with *PDGFRA* amplification (UMPED58) after supplementation with or without ligands *PDGF*  $\alpha$  and  $\beta$  (\*\*\*\*  $P \leq 0.00005$  by two-tailed Welch's t-test). Data represent mean  $\pm$  SEM. Scale bars: A(top): left 200  $\mu$ m, right 100  $\mu$ m; (bottom) up 200  $\mu$ m, down 50  $\mu$ m.

**A**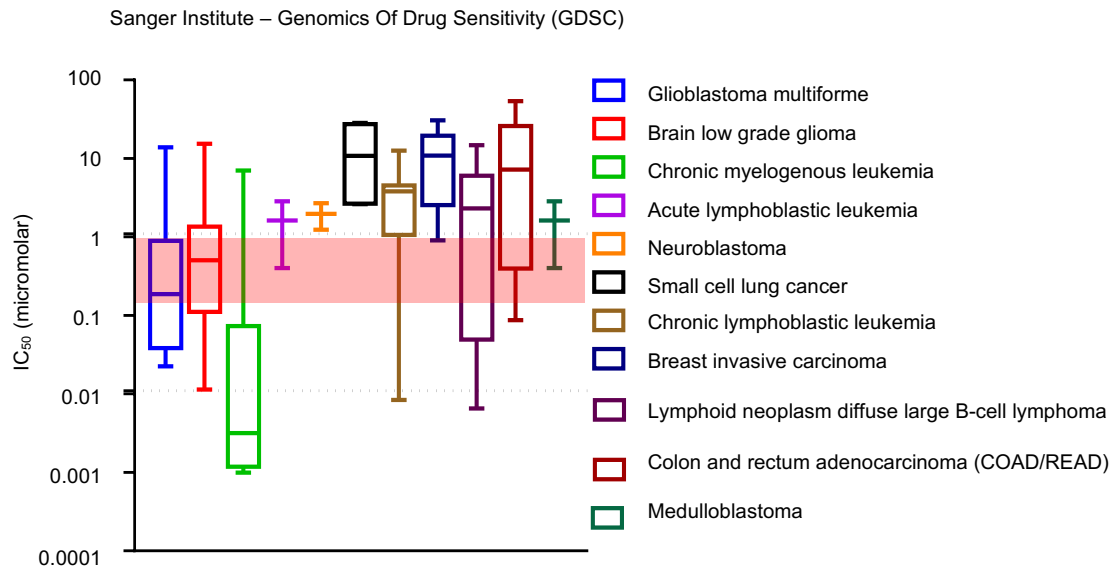

**Figure S2:** Sensitivity of human primary cell cultures to treatment with dasatinib **A)** Dasatinib dose-response curve for various cancer types (data from the Sanger Institute – Genomics of Drug Sensitivity). Most low-grade glioma and glioblastoma multiforme cell cultures were sensitive to dasatinib within 0.01 to 1  $\mu$ M ranges (red region).

**A**

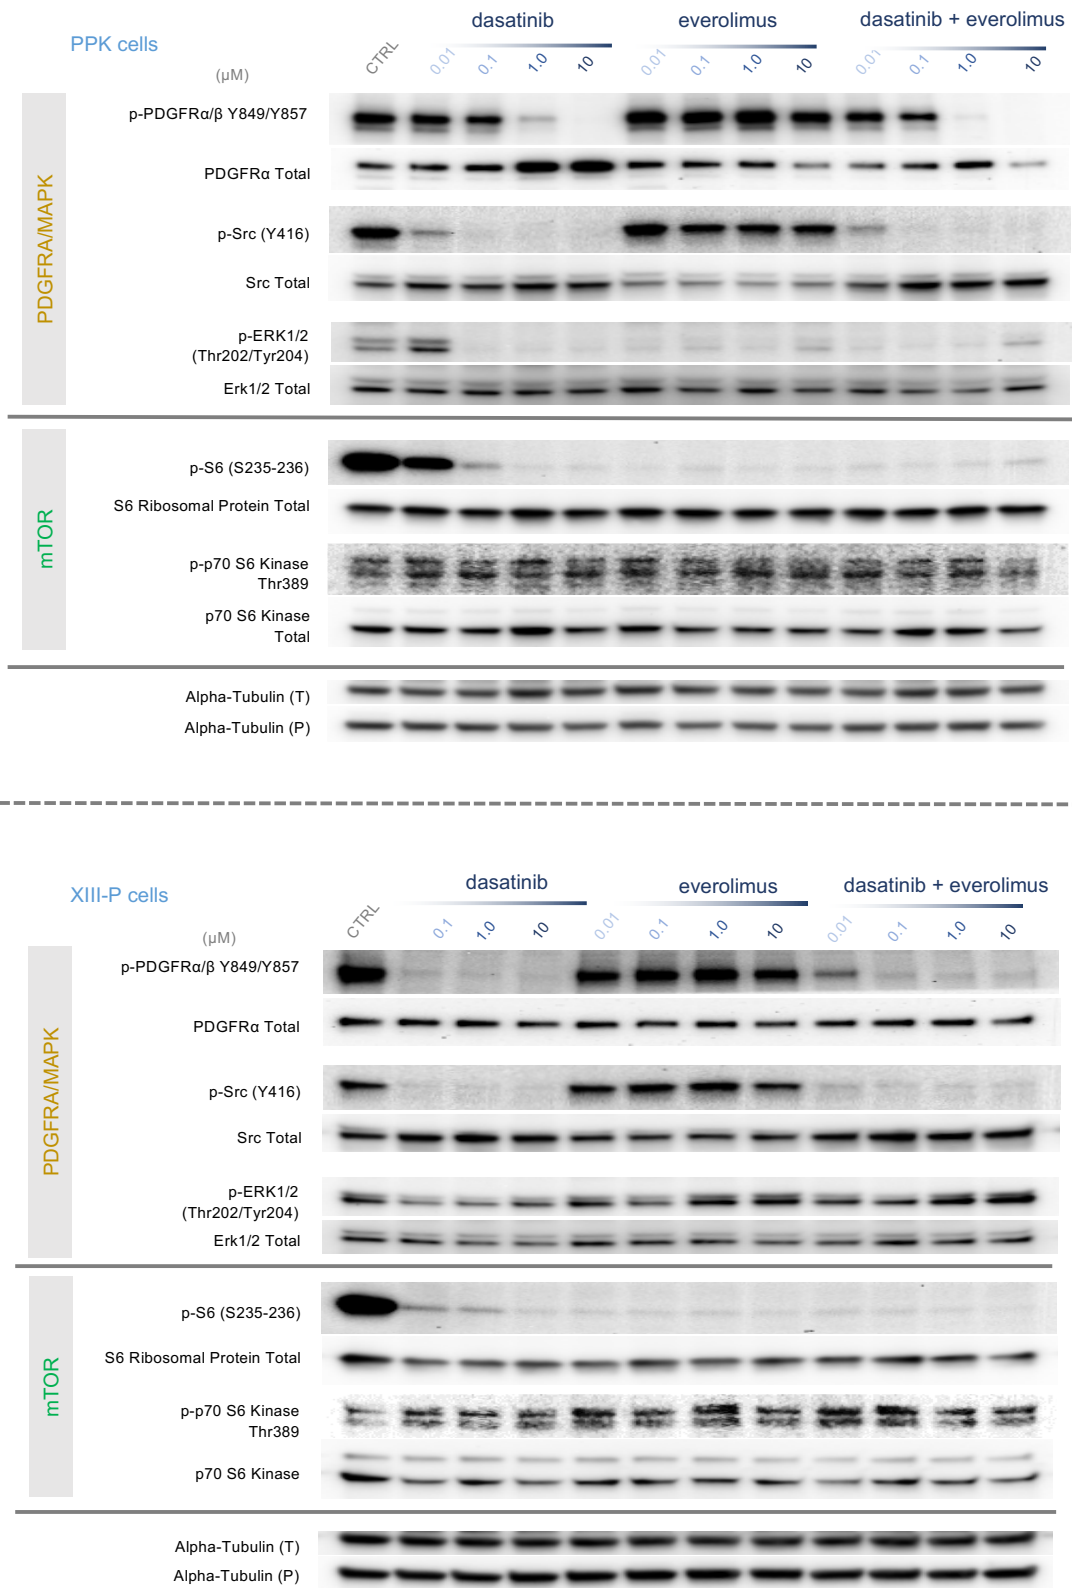

**Figure S3:** Effect of dasatinib and everolimus monotherapy or co-administration on RTK/MAPK/mTOR pathways **A)** Western blot data assessing the effect of dasatinib

monotherapy, everolimus monotherapy, or co-administration of both drugs in vitro on RTK/MAPK and mTOR pathways in mouse *PDGFRA*-mutant HGG cell line (left) or human *PDGFRA*-enhanced HGG cell line (right). Expression of p-PDGFR $\alpha/\beta$  (Y849/Y857), p-Src (Y416), p-ERK (Thr202/Tyr204), p-S6 (S235-236), p-p70 S6 Kinase (Thr389), and Alpha-Tubulin (control) were analyzed. In the co-administration condition, drugs were administered at equal doses (doses indicated in text above figure).

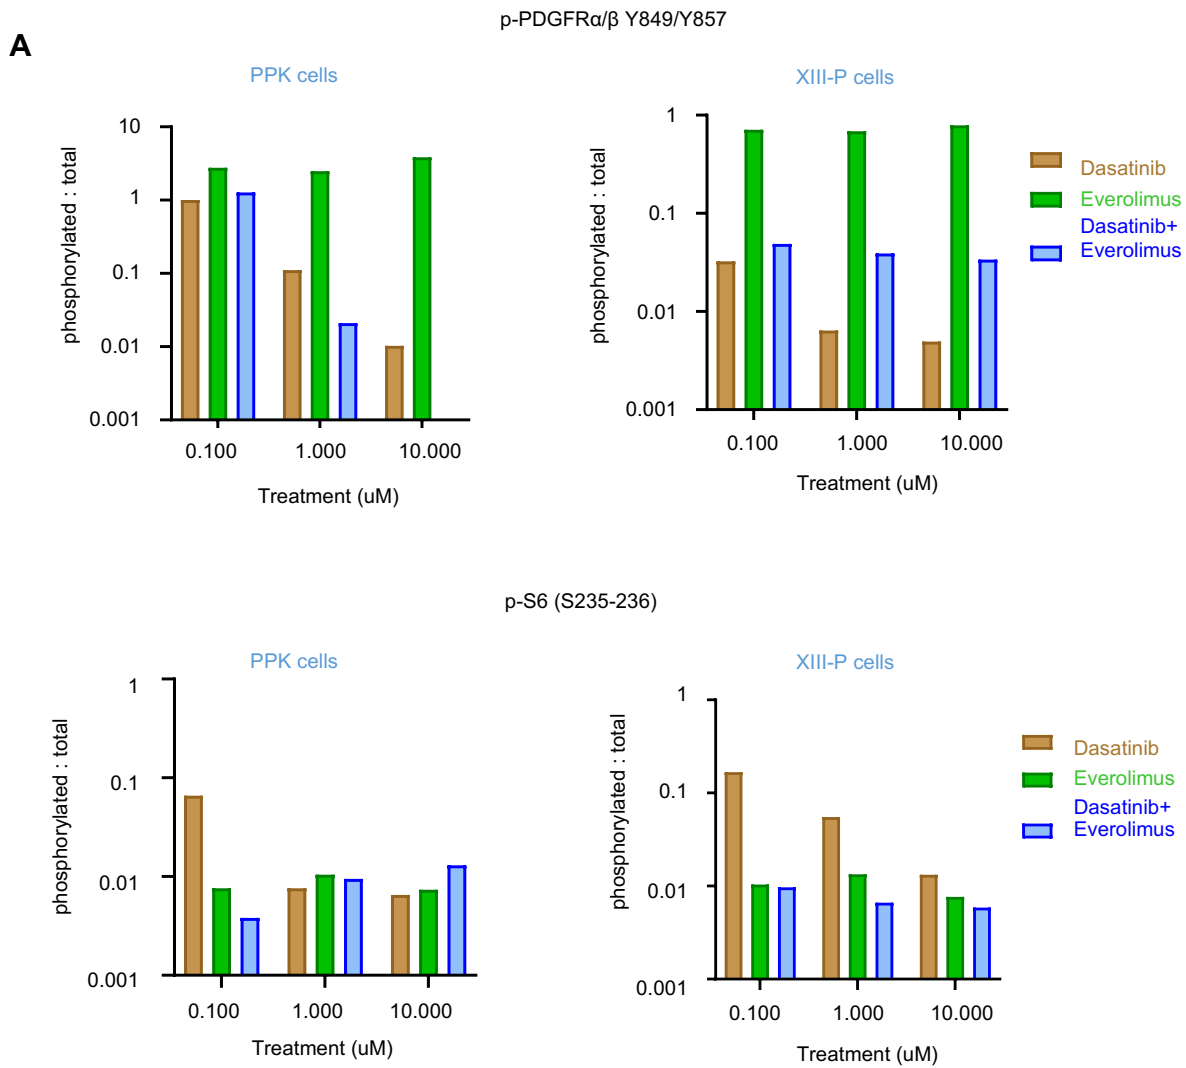

**Figure S4:** Quantification of western blot data shown in Supplemental Figure 3 **A)** Western blot data quantification showing that when compared to dasatinib or everolimus monotherapy, co-treatment of both drugs resulted in reduced expression of p-PDGFR $\alpha/\beta$  (Y849/Y857) in mouse PDGFRA-mutant glioma (PPK) cells at 1 and 10  $\mu$ M doses. Co-treatment also resulted in reduced expression of p-S6 (S235-236) at 0.1  $\mu$ M in PPK cells and at all administered concentrations in human PDGFRA-enhanced HGG (XIII-P) cells.

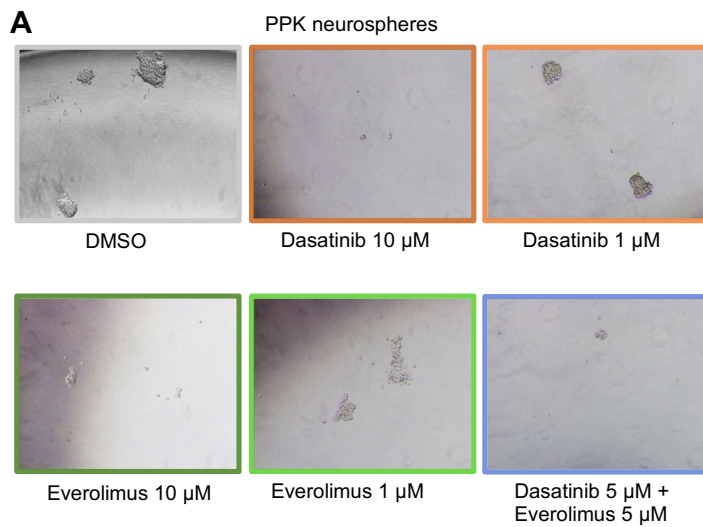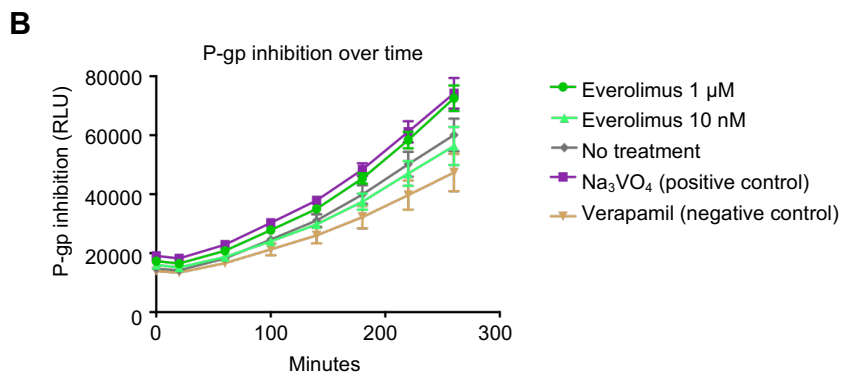

**Figure S5:** Dasatinib and everolimus efficacy in PPK neurospheres and P-gp inhibition over time. **A)** Representative PPK neurosphere images (n=3 per group) after treatment with dasatinib and everolimus monotherapy or in combination. **B)** P-gp inhibition by varying concentrations of everolimus over time using in vitro assay (n=5 technical replicates). [Data represent mean  $\pm$  SEM].

**A**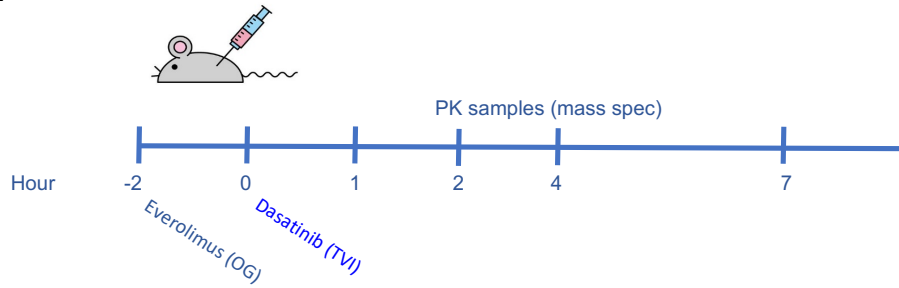**B**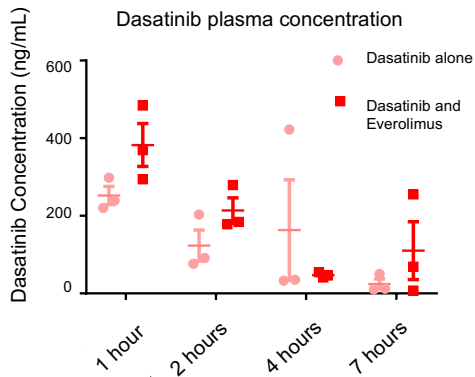**C**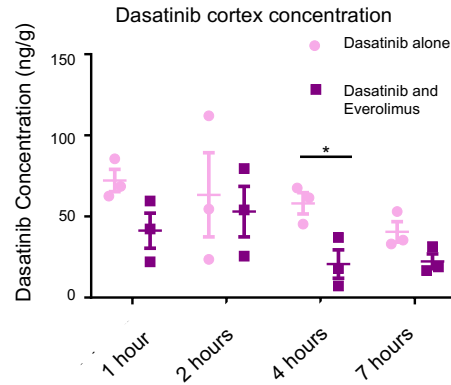**D**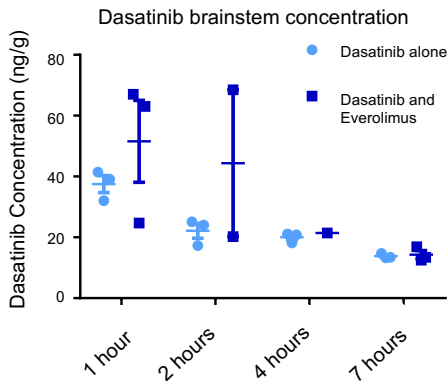**E**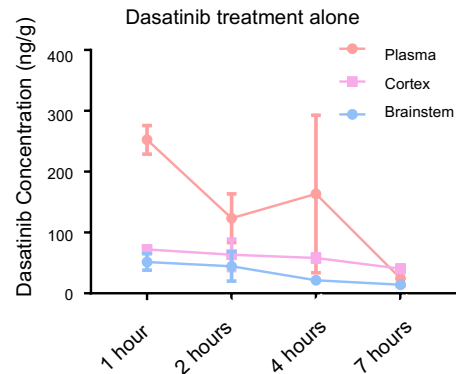**F**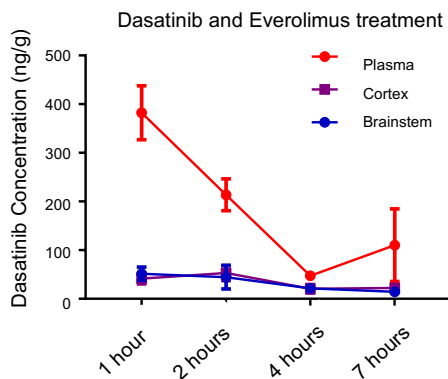

**Figure S6:** Pharmacokinetic (PK) analysis of dasatinib concentrations in non-tumor mouse model **A)** Schematic of PK mouse studies (tail vein injection (TVI) and oral gavage (OG)). **B)** Dasatinib plasma concentration (ng/mL) over time for treatment with dasatinib alone and

dasatinib with everolimus. No statistical significance was found between treatment groups at any time points by two-tailed Welch's t-tests. **C)** Dasatinib cortex concentration (ng/mL) over time for treatment with dasatinib alone and dasatinib with everolimus. Statistical significance was found between treatment groups at the 4 hour time point (\*\*\*\*  $P \leq 0.05$  by two-tailed Welch's t-test). No other statistical significance was found. **D)** Dasatinib brainstem concentration (ng/mL) over time for treatment with dasatinib alone and dasatinib with everolimus. No statistical significance was found between treatment groups at any time points by two-tailed Welch's t-tests. **E)** Dasatinib concentration (ng/mL) for plasma, cortex, and brainstem over time when treated with dasatinib alone. **F)** Dasatinib concentration (ng/mL) for plasma, cortex, and brainstem over time when treated with dasatinib and everolimus. [Data represent mean  $\pm$  SEM for B-F].



**A**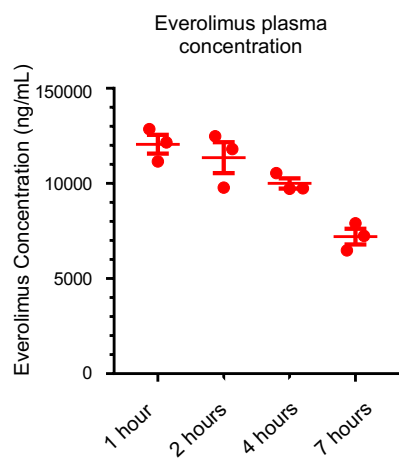**B**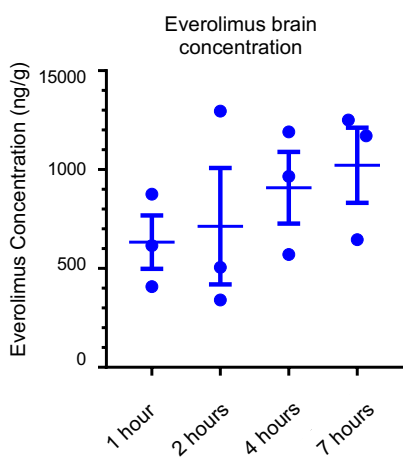

**Figure S7:** PK analysis of everolimus blood and brain concentration in non-tumor mouse model **A)** Everolimus plasma concentrations of (ng/mL) over time after treatment with everolimus [n=3 replicates]. **B)** Everolimus brain concentrations (ng/g) over time after treatment with everolimus [n=3 replicates]. [Data represent mean  $\pm$  SEM for A and B].

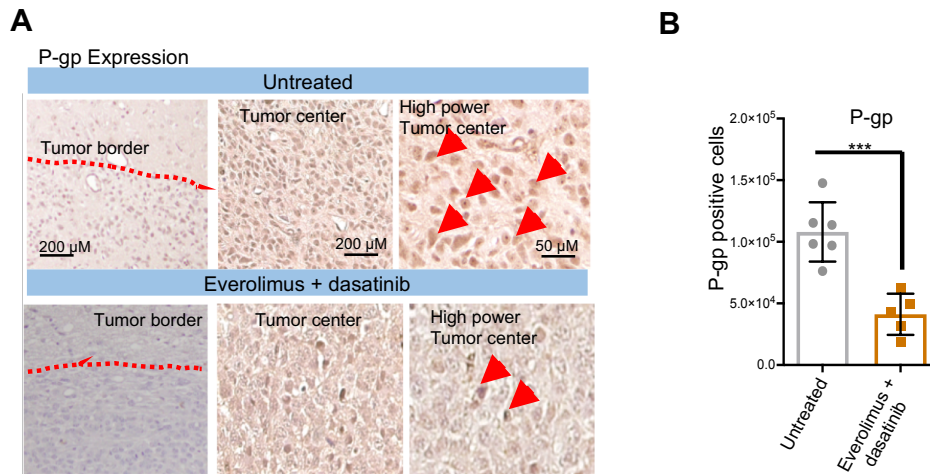

**Figure S8:** Immunohistochemistry of mouse tumors co-treated with dasatinib and everolimus immediately prior to processing. **A)** P-gp expression in the treated condition was shown to be reduced when compared to the untreated condition. Red arrows represent positive staining cells. Scale bars (from left to right): 200  $\mu$ m; 200  $\mu$ m; 50  $\mu$ m. **B)** IHC quantification for P-gp expression shown in part A (\*\*\*)  $P \leq 0.0005$  by two-tailed Welch's t-test) [n=6 replicates for untreated group and n=5 replicates for everolimus+dasatinib group]. [Data represent mean  $\pm$  SEM].

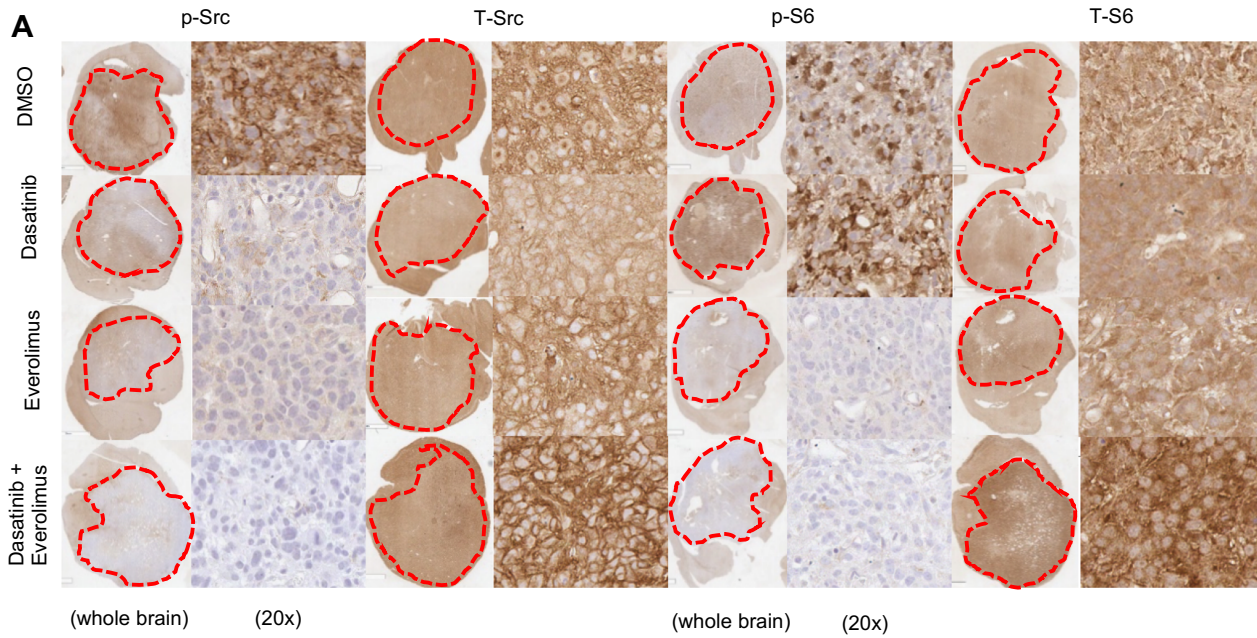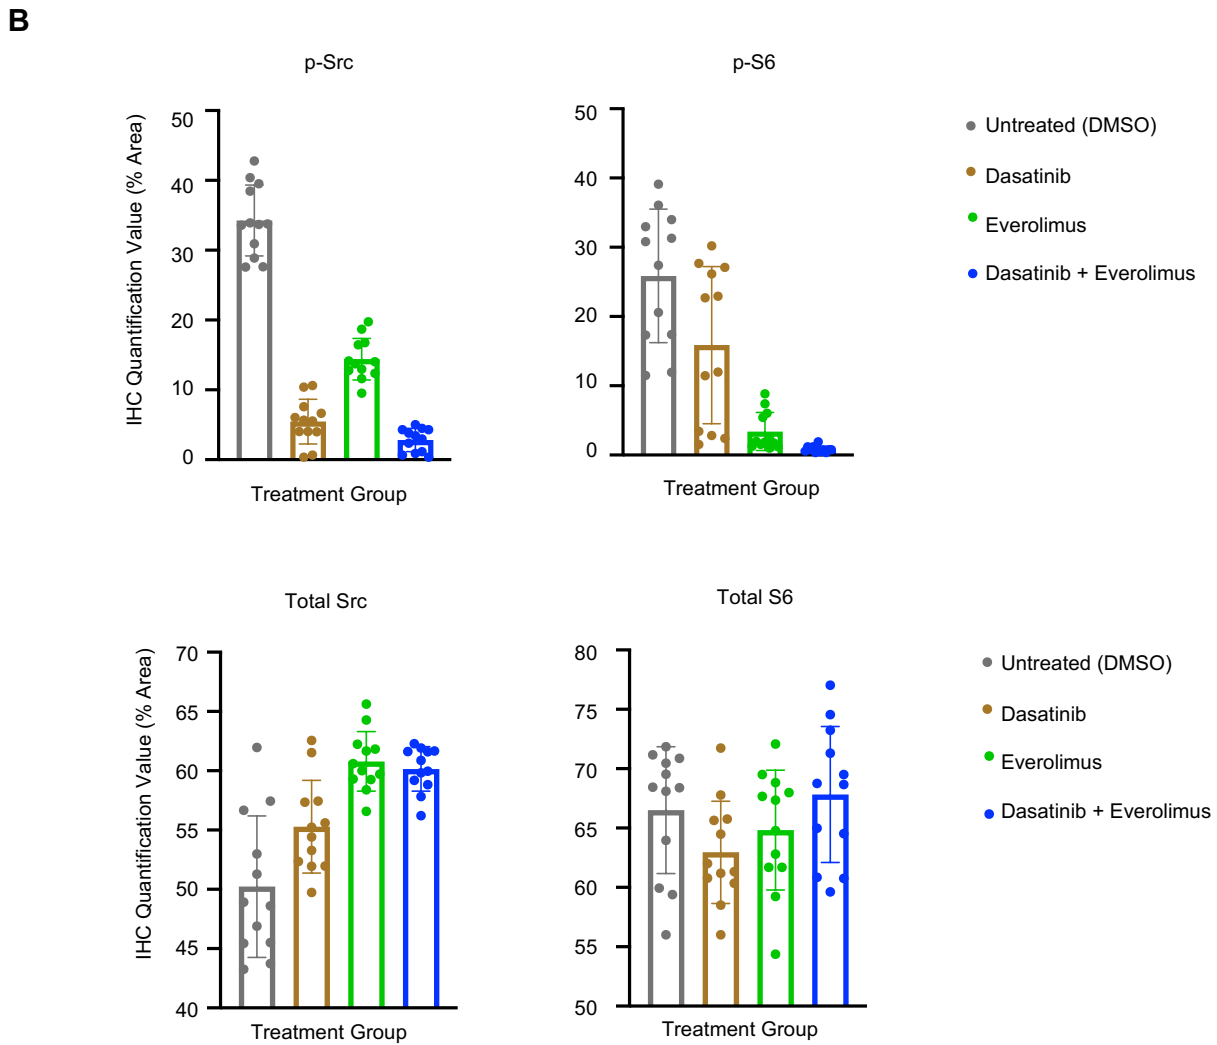

**Figure S9.** Effect of dasatinib and everolimus co-treatment or monotherapy on p-Src and p-S6 expression levels. **A)** Representative IHC staining images [n=3 mice per treatment

group]. Whole brain images with tumors outlined in red and 20x magnification tumor images are shown for p-Src, total Src (T-Src), p-S6, and total S6 (T-S6) staining. Dasatinib and everolimus co-treatment displayed the lowest staining for p-Src and p-S6. **B)** IHC quantification data for p-Src, p-S6, total Src, and total S6, showing the greatest reduction in expression levels in the co-treatment group when compared to the untreated group [n=3 animals per treatment group, 4 images per animal]. Statistical significance (see Figure 3) was found between the untreated group and co-treatment group for p-Src and p-S6 expression (\*\*\*\*  $P \leq 0.0001$  by Dunnett's multiple comparisons test). [Data represent mean  $\pm$  SEM].

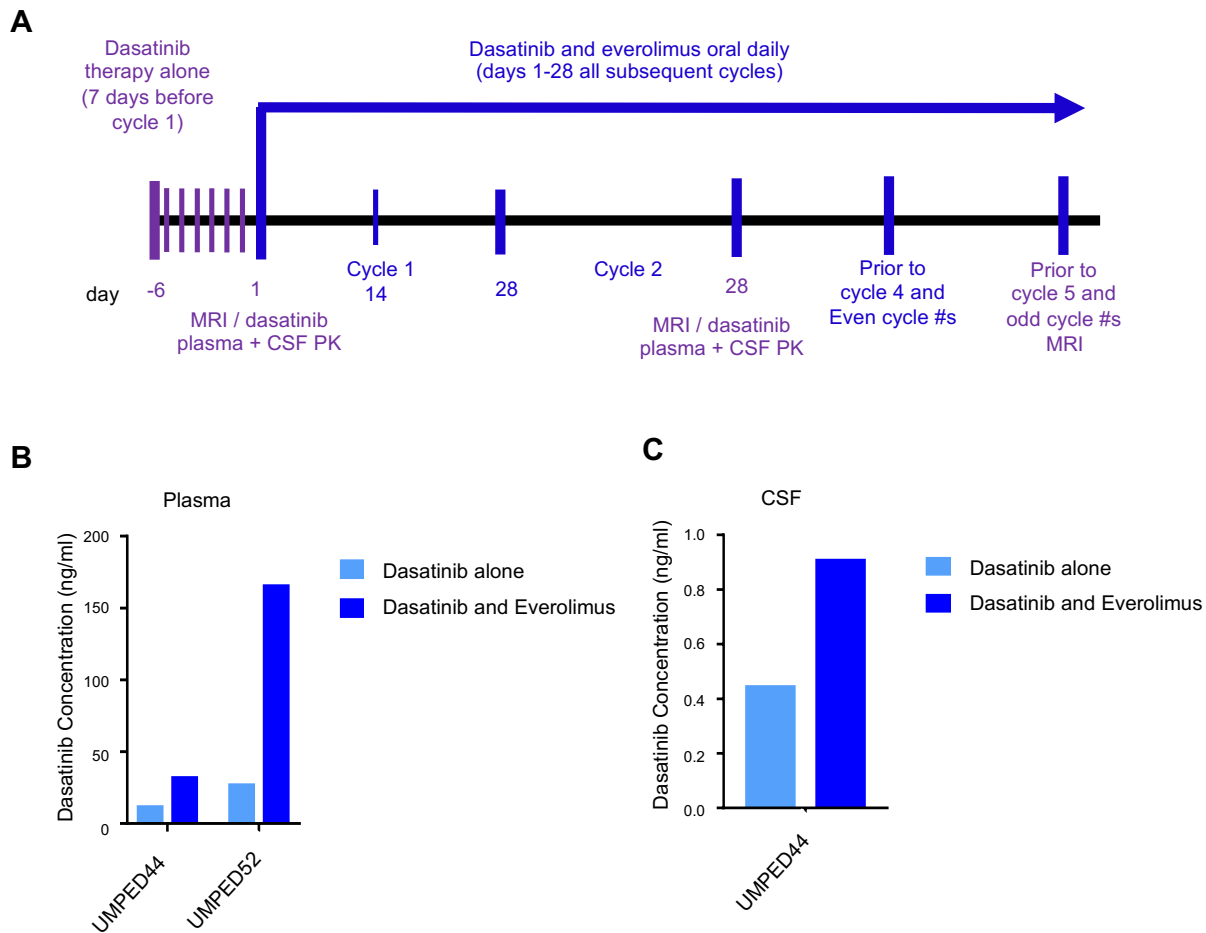

**Figure S10:** Pharmacokinetic (PK) analysis of dasatinib concentrations in plasma and CSF in patients **A)** Time course depicting when MRI images and dasatinib plasma + CSF PK analyses were performed during treatment of two human patients with PDGFR $\alpha$ -driven glioma (UMPED44 and UMPED52). **B)** Comparison of plasma dasatinib concentrations for dasatinib alone and dasatinib and everolimus co-treatment for UMPED44 and UMPED52. **C)** Comparison of CSF dasatinib concentrations for dasatinib alone and dasatinib and everolimus co-treatment conditions for UMPED44.

**A**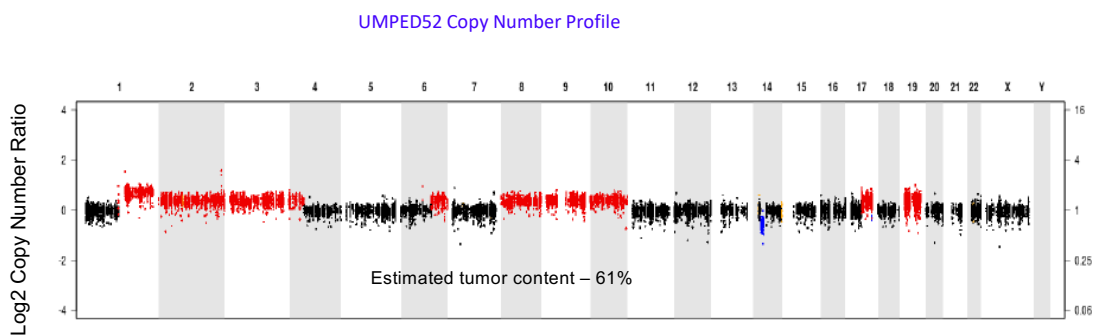**B**

UMPED52 Somatic  
Variants

| Gene          | Effect   | Protein Change | Variant Allele Fraction |
|---------------|----------|----------------|-------------------------|
| <i>PDGFRA</i> | Missense | p.D842V        | 28%                     |
| <i>DCC</i>    | Missense | p.T146I        | 31%                     |
| <i>ACVR2B</i> | Missense | p.E1039*       | 20%                     |

**C**

UMPED52 baseline CSF tDNA

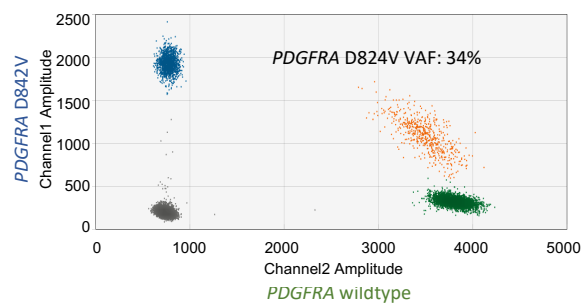**D**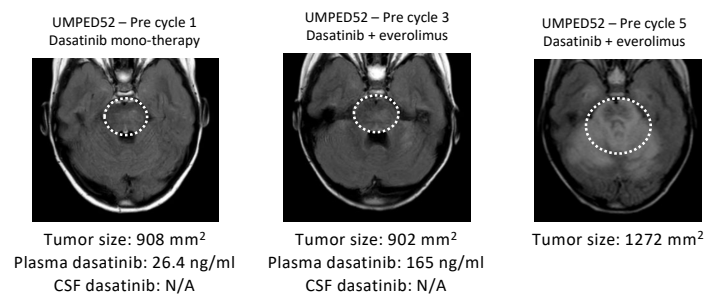

**Figure S11:** Molecular attributes and tumor imaging of *PDGFRA*-mutated tail patient (UMPED52) **A)** UMPED52 copy number profile with estimated tumor content. **B)** UMPED52 somatic variants with a *PDGFRA* variant allele fraction of 34%. **C)** UMPED52 baseline CSF tDNA documenting *PDGFRA* D824V allele fraction. **D)** Serial UMPED52 MRI (axial FLAIR T2) at baseline, pre cycle 3, and pre cycle 4.

**A**

PedcBioPortal (adult HGG) P-gp RNA-seq

P-gp expression by *PDGFRA* status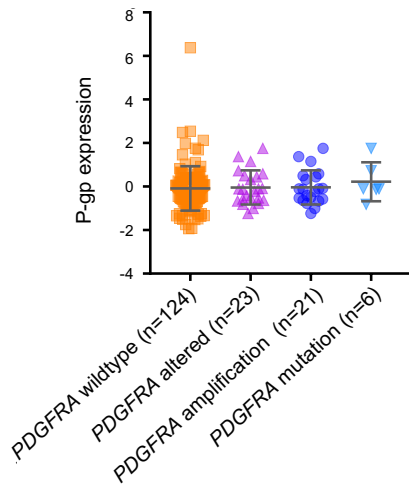

P-gp expression by age at diagnosis

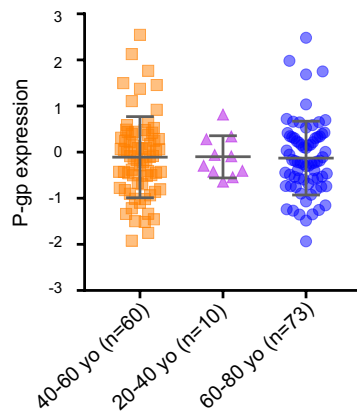P-gp expression by *MGMT* status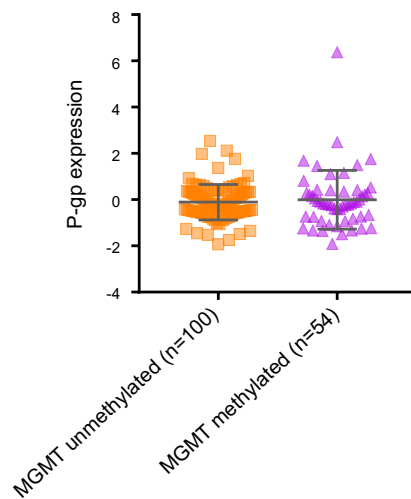

**Figure S12:** PedcBioPortal (adult HGG) P-gp RNA-seq data **A)** No statistical significance was found between P-gp expression and *PDGFRA* status, age at diagnosis, or *MGMT* status within these adult data sets. Data represent mean  $\pm$  SEM.
